# Supplementary material for: Pyrvinium pamoate changes alternative splicing of the serotonin receptor 2C by influencing its RNA structure
Source: PubMed Central journal article supplement — Nucleic Acids Res. 2013 Feb 6;41(6):3819–32. doi: 10.1093/nar/gkt063 (PMC3616728; doi:10.1093/nar/gkt063), 2013-02-06
Supplement: supp_gkt063_nar-03081-a-2012-File003.pdf [file supp_gkt063_nar-03081-a-2012-File003.pdf]

## **SUPPLEMENTAL DATA**

### *Supplemental Figure 1: Properties of the screen*

A. GFP/RFP ratio at three different time points from one micro titer plate. The log of the GFP and RFP ratio at day, 0, 1, 2, and 3 is plotted. The data points representing pyrvinium pamoate are indicated.

B. Regression analysis of the screen. The slope of the compounds shown in panel A is shown. Substances outside the 3 fold standard deviations were selected for further analysis.

C. Regression slope of all compounds in the screen.

### *Supplemental Figure 2: Screen results*

A. Schematic representation of the number of hits from the two stable cell lines.

B. List of 22 compounds that changes alternative splicing in both cell lines in the primary screen.

### *Supplemental Figure 3: CLUSTAL W alignment of HTR2c pre-RNAs.*

The sequences corresponding to the regulated RNA shown in Figure 6 were aligned with CLUSTAL W. Changes are highlighted in yellow.

### *Supplemental Figure 4: RT-PCR validation of changes in alternative splicing caused by pyrvinium pamoate after six hours.*

The highest-ranking changes caused by six hours treatment of cells with pyrvinium pamoate were tested by RT-PCR using primers in the flanking constitutive exons.

### *Supplemental Figure 5: RT-PCR validation of Changes in alternative splicing caused by pyrvinium pamoate after sixteen hours.*

The highest-ranking changes caused by six hours treatment of cells with pyrvinium pamoate were tested by RT-PCR using primers in the flanking constitutive exons.

### *Supplemental Figure 6: Pathways changed by pyrvinium pamoate*

### *Supplemental Figure 7: Excel files showing the results of the array experiments*

# Supplemental Figure 1

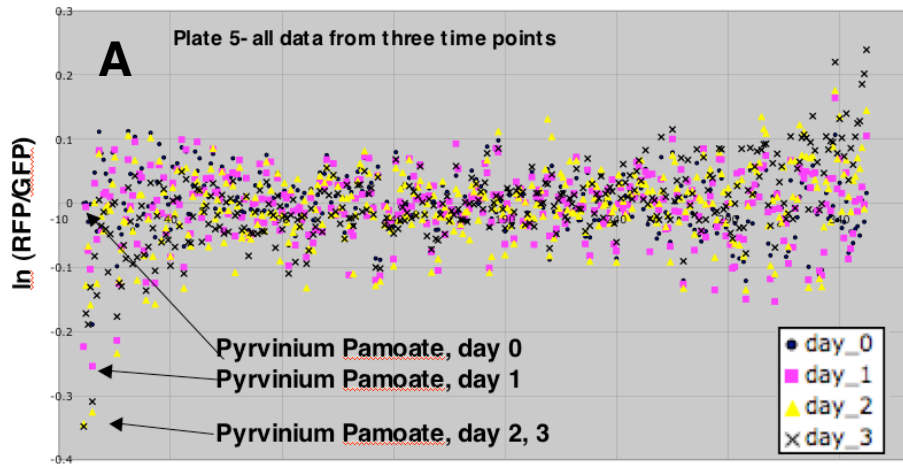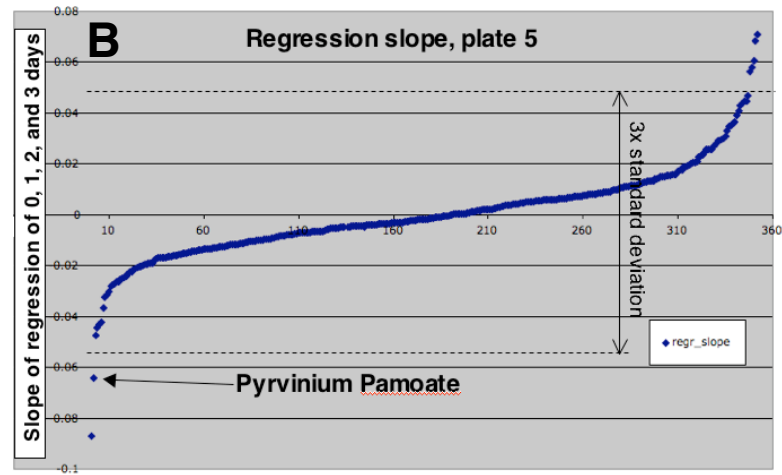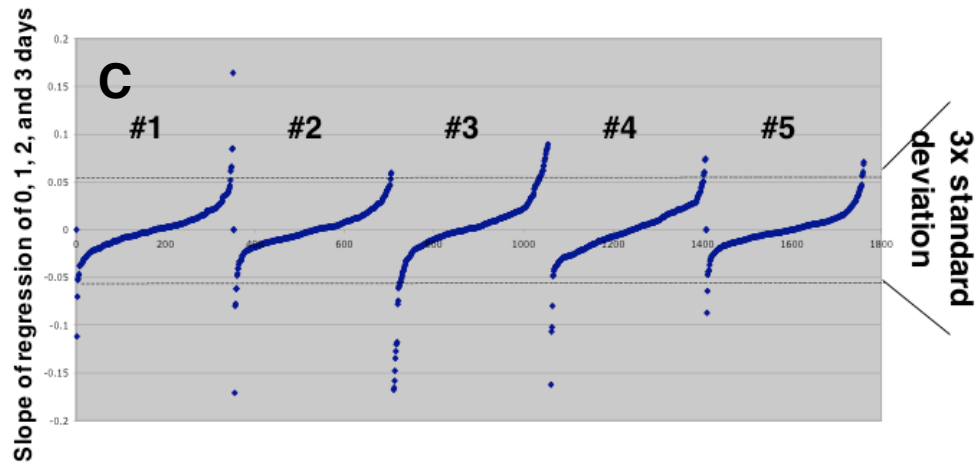

## Supplemental Figure 2

Hits from stable cell line 1

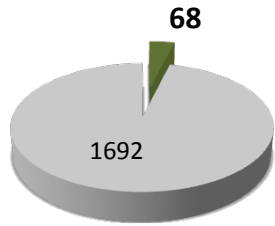

Hits from stable cell line 2

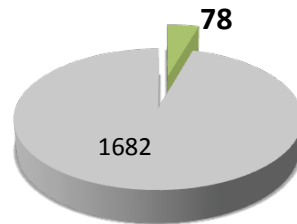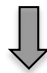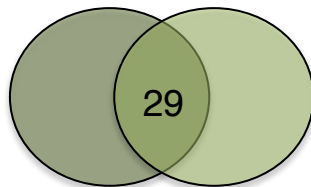

29 hits shared in the two cell lines

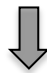

Excluding translation modulators

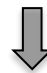

22 compounds

### List of compounds active in both cell lines

- (-)-Isoproterenol hydrochloride
- Ajmalicine
- Corynanthine hydrochloride
- Diltiazem
- Doxorubicin hydrochloride
- Ergocryptine-alpha
- Fluvastatin
- Harmaline
- Hexetidine
- Lysergol
- Menadione
- Mycophenolic acid
- Nitrarine dihydrochloride
- Phenazopyridine
- Pyrvinium pamoate
- Quinacrine
- Rauwolscine hydrochloride
- Reserpine
- S(+)-Terguride
- Scoulerine
- Simvastatin
- Yohimbinic acid monohydrate

**Supplemental Figure 3: Alignment of the known serotonin receptor 2C pre-mRNAs**

```

human      TACGTAATCCTATTGAGCATAGCCGTTTCAATTCGCGGACTAAGGCCATCATGAAGATTG 60
chimp     TACGTAATCCTATTGAGCATAGCCGTTTCAATTCGCGGACTAAGGCCATCATGAAGATTG 60
gorilla   TACGTAATCCTATTGAGCATAGCCGTTTCAATTCGCGGACTAAGGCCATCATGAAGATTG 60
orangutan TACGTAATCCTATGAGCATAGCCGTTTCAATTCGCGGACTAAGGCCATCATGAAGATTG 59
gibbon    TACGTAATCCTATTGAGCATAGCCGTTTCAATTCGCGGACTAAGGCCATCATGAAGATTG 60
rhesus    TACGTAATCCTATTGAGCATAGCCGTTTCAATTCGCGGACTAAGGCCATCATGAAGATTG 60
marmoset  TACGTAATCCTATTGAGCATAGCCGTTTCAATTCGCGGACTAAGGCCATCATGAAGATTG 60
mouse     TACGTAATCCTATTGAGCATAGCCGTTTCAATTCGCGGACTAAGGCCATCATGAAGATTG 60
rat       TACGTAATCCTATTGAGCATAGCCGTTTCAATTCGCGGACTAAGGCCATCATGAAGATTG 60
Nakedmole TACGTAATCCTATTGAGCATAGTTCGTTTCAATTCGCGGACTAAGGCCATCATGAAGATTG 60
rabbit    TACGTAATCCTATTGAGCATAGCCGTTTCAATTCGCGGACTAAGGCCATCATGAAGATTG 60
pig       TACGTAATCCTATTGAGCATAGCCGTTTCAATTCAGGACTAAGGCCATCATGAAGATTG 60
cow       TACGTAATCCTATTGAGCATAGCCGTTTCAATTCAGGACTAAGGCCATCATGAAGATTG 60
horse     TACGTAATCCTATTGAGCATAGCCGTTTCAATTCGCGGACTAAGGCCATCATGAAGATTG 60
dog       TACGTAATCCTATTGAGCATAGCCGTTTCAATTCGCGGACTAAGGCCATCATGAAGATTG 60
panda     TACGTAATCCTATTGAGCATAGCCGTTTCAATTCGCGGACTAAGGCCATCATGAAGATTG 60
microbat  TACGTAATCCTATTGAGCATAGCCGTTTCAATTCGCGGACTAAGGCCATCATGAAGATTG 60
*****

human      CTATTGTTGGGCAATTTCTATAGGTAATAAACTTTTGGCCATAAGAATTGCAGCGG 120
chimp     CTATTGTTGGGCAATTTCTATAGGTAATAAACTTTTGGCCATAAGAATTGCAGCGG 120
gorilla   CTATTGTTGGGCAATTTCTATAGGTAATAAACTTTTGGCCATAAGAATTGCAGCGG 120
orangutan CTATTGTTGGGCAATTTCTATAGGTAATGAACTTTTGGCCATAAGAATTGCAGCGG 119
gibbon    CTATTGTTGGGCAATTTCTATAGGTAATAAACTTTTGGCCATAAGAATTGCAGCGG 120
rhesus    CTATTGTTGGGCAATTTCTATAGGTAATAAACTTTTGGCCGTAAGAATTGCAGCGG 120
marmoset  CTATTGTTGGGCAATTTCTATAGGTAATAAACTTTTGGCCGTAAGAATTGCAGCGG 120
mouse     CCATCGTTGGGCAATATCAATAGGTAATA---TACCTGGCCA-TAGAATTGCAGCGG 115
rat       CCATCGTTGGGCAATATCAATAGGTAATA---TACCTGGCCA-TAGAATTGCAGCGG 115
Nakedmole CTATTGTTGGGCAATTTCTATAGGTAATAAACTTTTGGCCATAGAAATGCAACGG 119
rabbit    CTATCGTTGGGCAATTTCTATAGGTAATAAACTTTTGGCCATAGAAATGCAACGG 120
pig       CTATTGTTGGGCAATTTCTATAGGTAATGAACTTTTGGCCAGTAGAAATGCAACGG 119
cow       CTATTGTTGGGCAATTTCTATAGGTAATAAACTTTTGGCCAGTAGAAATGCAACGG 119
horse     CTATAGTTGGGCAATTTCTATAGGTAATAAACTTTTGGCCATAGAAATGCAACGG 119
dog       CTATTGTTGGGCAATTTCTATAGGTAATAAACTTTTGGCCATAGAAATGCAACGG 119
panda     CTATTGTTGGGCAATTTCTATAGGTAATAAACTTTTGGCCATAGAAATGCAACGG 119
microbat  CTATCGTTGGGCAATTTCTATAGGTAATAAACTTTTGGCCATAGAAATGCAACGG 119
* * * * *

human      CTATGCTCAATACTTTCGGATTATGTA 147
chimp     CTATGCTCAATACTTTCGGATTATGTA 147
gorilla   CTATGCTCAATACTTTCGGATTATGTA 147
orangutan CTATGCTCAATACTTTCGGATTATGTA 146
gibbon    CTATGCTCAATACTTTCGGATTATGTA 147
rhesus    CTATGCTCAATACTTTCGGATTATGTA 147
marmoset  CTATGCTCAATACTTTCGGATTATGTA 147
mouse     CTATGCTCAATACTTTCGGATTATGTA 142
rat       CTATGCTCAATACTTTCGGATTATGTA 142
Nakedmole CTATGCTCAATACTTTCGGATTATGTA 146
rabbit    CTATGCTCAATACTTTCGGATTATGTA 147
pig       CTATGCTCAATACTTTCGGATTATGTA 146
cow       CTATGCTCAATACTTTCGGATTATGTA 146
horse     CTATGCTCAATACTTTCGGATTATGTA 146
dog       CTATGCTCAATACTTTCGGATTATGTA 146
panda     CTATGCTCAATACTTTCGGATTATGTA 146
microbat  CTATGCTCAATACTTTCGGATTATGTA 146
*****

```

# Supplemental Figure 4

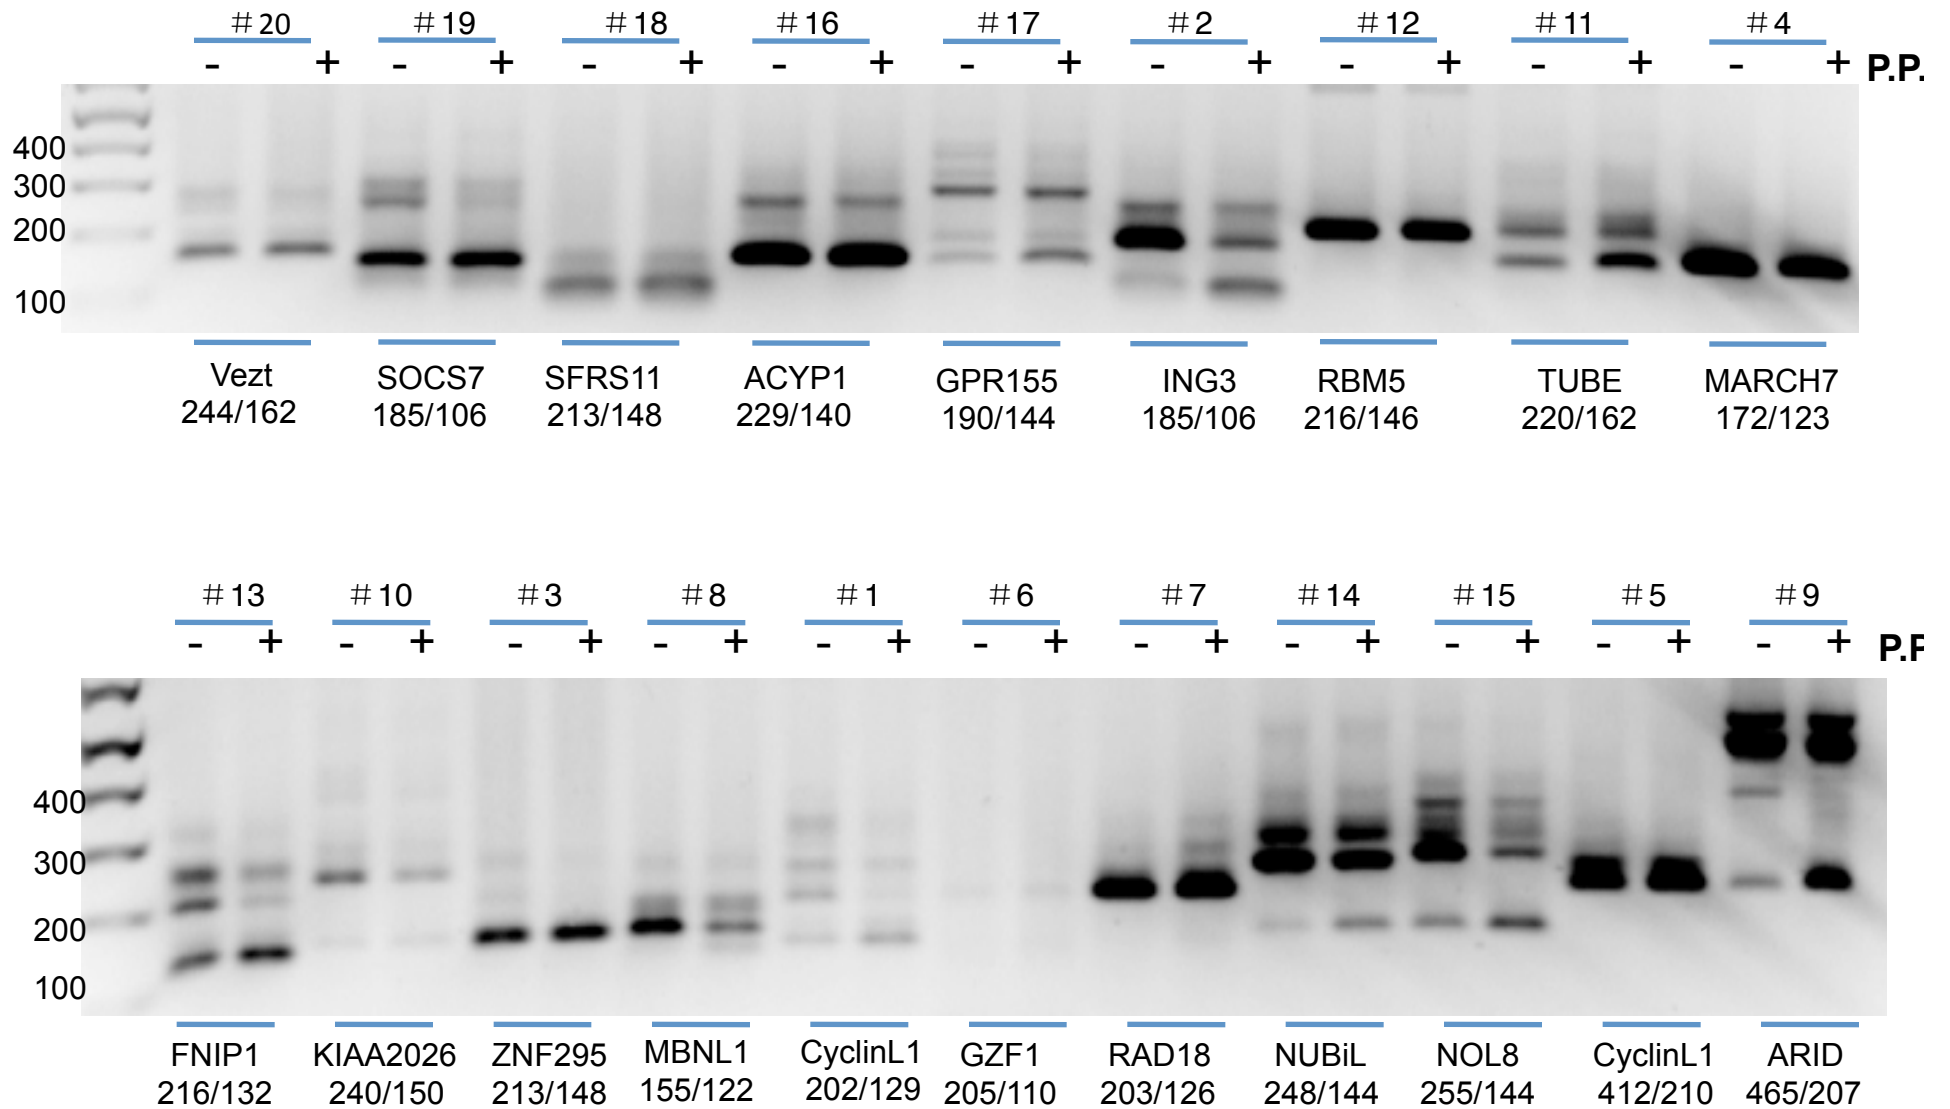

#: Rank in the cassette exon array data

# Supplemental Figure 5

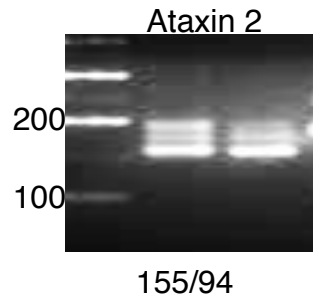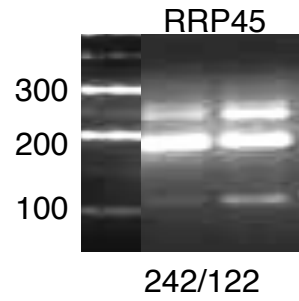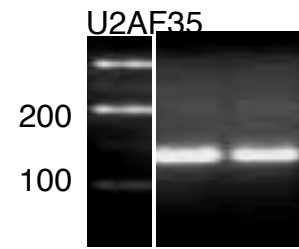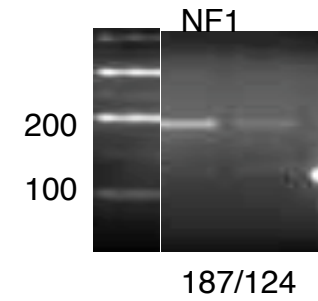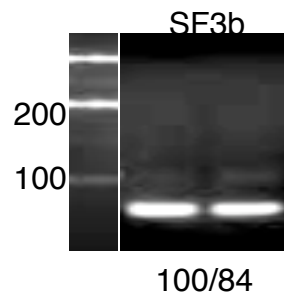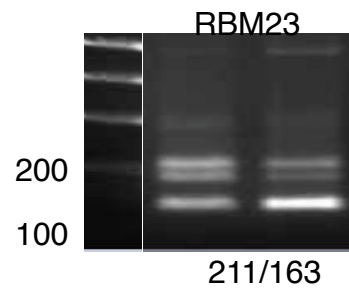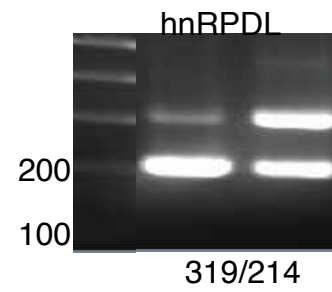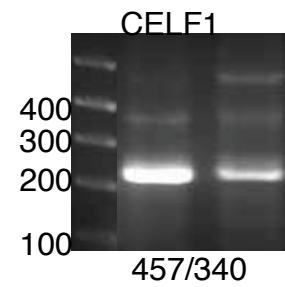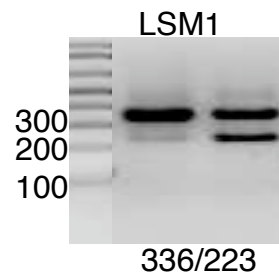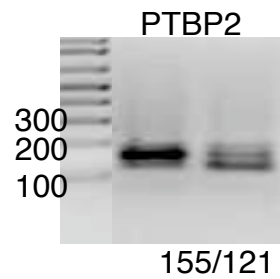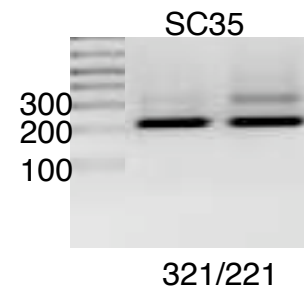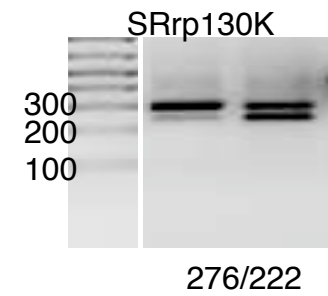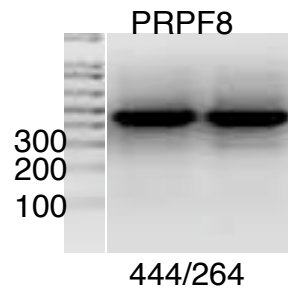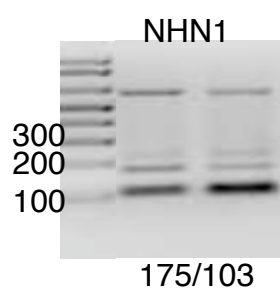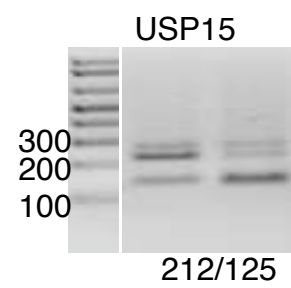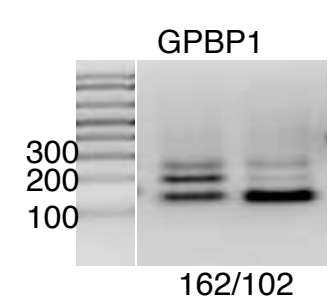

# Supplemental Figure 6

## After 6 hours

176 gene changes  
379 changes in splicing

Toll-like receptor signaling pathway  
28%

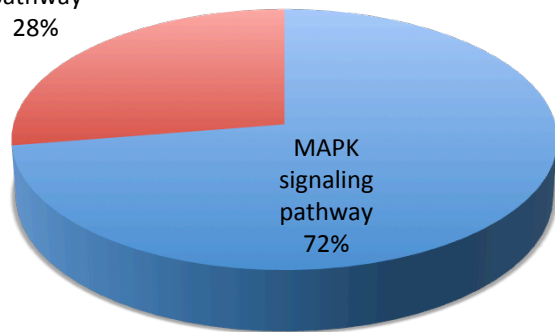

## After 18 hours

1120 cassette exons  
5284 regulated genes

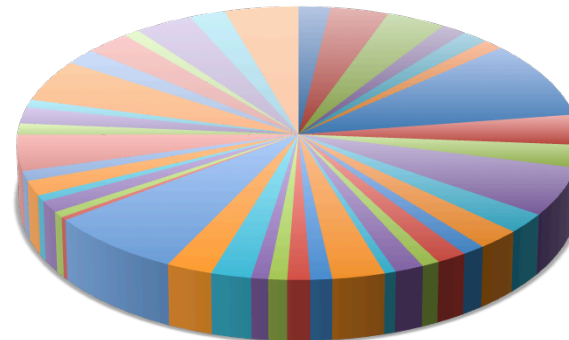

## Regulated genes

- |                                                      |                                                       |
|------------------------------------------------------|-------------------------------------------------------|
| p53 signaling pathway                                | ol signaling system                                   |
| Spliceosome                                          | Prostate cancer                                       |
| Axon guidance                                        | MAPK signaling pathway                                |
| Basal cell carcinoma                                 | Sulfur metabolism                                     |
| Inositol phosphate metabolism                        | Glycosylphosphatidylinositol(GPI)-anchor biosynthesis |
| Valine, leucine and isoleucine degradation           | Glycerolipid metabolism                               |
| Pathways in cancer                                   | Glycosaminoglycan biosynthesis - heparan sulfate      |
| Cell cycle                                           | NOD-like receptor signaling pathway                   |
| Fc gamma R-mediated phagocytosis                     | Bladder cancer                                        |
| Endocytosis                                          | Wnt signaling pathway                                 |
| ECM-receptor interaction                             | N-Glycan biosynthesis                                 |
| Small cell lung cancer                               | PPAR signaling pathway                                |
| Amino sugar and nucleotide sugar metabolism          | Base excision repair                                  |
| RNA degradation                                      | Calcium signaling pathway                             |
| Fructose and mannose metabolism                      | Adipocytokine signaling pathway                       |
| Hedgehog signaling pathway                           | Pyrimidine metabolism                                 |
| Glycosaminoglycan biosynthesis - chondroitin sulfate | Ether lipid metabolism                                |
| Melanogenesis                                        | Neurotrophin signaling pathway                        |
| Fatty acid metabolism                                | Glycerophospholipid metabolism                        |
| Lysine degradation                                   | Purine metabolism                                     |
| Basal transcription factors                          |                                                       |
| Propanoate metabolism                                |                                                       |
| Phosphatidylinosit                                   |                                                       |
